# Supplementary material for: Single molecular colorimetric probe for simultaneous estimation of Cu2+ and Ni2+
Source: Royal Society of Chemistry journal article supplement (doi:10.1039/b703529b), 2007-01-01
Supplement: b703529b.pdf [file b703529b.pdf]

## Electronic Supplemental Information

# Single Molecular Colorimetric Probe for Simultaneous Estimation of $\text{Cu}^{2+}$ and $\text{Ni}^{2+}$

Navneet Kaur and Subodh Kumar\*

Department of Chemistry, Guru Nanak Dev University,  
Amritsar-143005, India.

[Subodh\\_gndu@yahoo.co.in](mailto:Subodh_gndu@yahoo.co.in)

## 1. Experimental Section

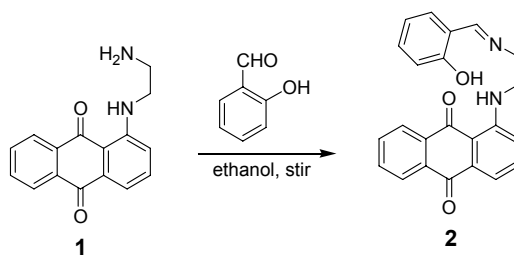

**1a. Spectral and other data of Schiff base 2**, dark red solid; 80%; m.p. 150 - 151 °C ( $\text{C}_2\text{H}_5\text{OH}-\text{CHCl}_3$ ); FAB mass  $M^+ m/z$  371 ( $M^++1$ ); IR  $\nu_{\text{max}}$  (KBr) 1629 (C=O), 1668 (C=O), 3275 (NH/OH)  $\text{cm}^{-1}$ ;  $^1\text{H}$  NMR ( $\text{CDCl}_3$ ):  $\delta$  3.72 (q,  $J = 6.0$  Hz, 4H,  $\text{CH}_2$ ), 3.96 (t,  $J = 6.0$  Hz, 2H,  $\text{CH}_2$ ), 6.87 (t,  $J = 7.5$  Hz, 1H, ArH), 6.97 (d,  $J = 7.8$  Hz, 1H, ArH), 7.13 (d,  $J = 8.4$  Hz, 1H, ArH), 7.25-7.34 (m, 2H, ArH), 7.53-7.63 (m, 2H, ArH), 7.68 (t,  $J = 7.5$  Hz, 1H, ArH), 7.75 (t,  $J = 7.5$  Hz, 1H, ArH), 8.24 (t,  $J = 7.5$  Hz, 2H, ArH), 8.45 (s, 1H, CH), 9.92 (bs, 1H, NH, exchanges with  $\text{D}_2\text{O}$ ), 12.8 (bs, 1H, OH, exchanges with  $\text{D}_2\text{O}$ );  $^{13}\text{C}$  NMR (normal / DEPT-135) ( $\text{CDCl}_3$ ):  $\delta$  43.36 (-ve,  $\text{CH}_2$ ), 58.71 (-ve,  $\text{CH}_2$ ), 113.36 (absent, ArC), 116.03 (+ve, ArCH), 117.02 (+ve, ArCH), 117.67 (+ve, ArCH), 118.64 (+ve, ArCH), 118.72 (absent, ArC), 126.67 (+ve, ArCH), 126.80 (+ve, ArCH), 131.53 (+ve, ArCH), 132.52 (+ve, ArCH), 132.94 (+ve, ArCH), 132.99 (absent, ArC), 133.92 (+ve, ArCH), 134.70 (absent, ArC), 134.87 (absent, ArC), 135.35 (+ve, ArCH), 151.44 (absent, ArC), 160.92 (absent, ArC), 166.80 (+ve, ArCH), 183.71 (absent, CO), 185.14 (absent, CO); Found C 74.27; H 4.9; N 7.46%.  $\text{C}_{23}\text{H}_{18}\text{N}_2\text{O}_3$  requires C 74.58, H 4.90; N 7.58%.

**1b. Spectral and other data of Schiff base 2 +  $\text{Ni}^{2+}$  complex**. dark green solid; 75%; m.p. 235 °C ( $\text{C}_2\text{H}_5\text{OH}-\text{CHCl}_3$ ); FAB mass  $M^+ m/z$  427 ( $M^++1$ ); IR  $\nu_{\text{max}}$  (KBr) 1629(C=O), 1654(C=O), 3384-3527(b)  $\text{cm}^{-1}$ ;  $^1\text{H}$  NMR ( $\text{CDCl}_3$ ):  $\delta$  3.22 (t,  $J = 6.6$  Hz, 4H,  $\text{CH}_2$ ), 3.51 (t,  $J = 6.6$  Hz, 2H,  $\text{CH}_2$ ), 6.56 (t,  $J = 7.2$  Hz, 1H, ArH), 6.99 (d,  $J = 9.0$  Hz, 2H, ArH), 7.07-7.23 (m, 2H, ArH), 7.26 (s, 1H, ArH), 7.53-7.63 (m, 2H, ArH), 7.68 (t,  $J = 7.5$  Hz, 1H, ArH), 7.34 (s, 1H, CH), 7.41 (d,  $J = 6.6$  Hz, 1H, ArH), 7.63 (t,  $J = 6.9$  Hz, 1H, ArH), 7.70 (t,  $J = 6.6$  Hz, 1H, ArH), 8.15 (d,  $J = 7.2$  Hz, 1H, ArH), 8.29 (d,  $J = 7.8$  Hz, 1H, ArH);  $^{13}\text{C}$  NMR (normal / DEPT-135) ( $\text{CDCl}_3$ ):  $\delta$  51.03 (-ve,  $\text{CH}_2$ ), 60.12 (-ve,  $\text{CH}_2$ ), 113.81 (absent, ArC), 114.77 (+ve, ArCH), 118.51 (+ve, ArCH), 120.54 (+ve, ArCH), 120.64 (absent, ArC), 122.16

(+ve, ArCH), 126.42 (+ve, ArCH), 127.62 (+ve, ArCH), 131.06 (+ve, ArCH), 131.37 (absent, ArC), 132.23 (+ve, ArCH), 132.35 (+ve, ArCH), 133.15 (+ve, ArCH), 135.64 (+ve, ArCH), 133.74 (absent, ArC), 133.84 (absent, ArC), 153.78 (absent, ArC), 160.81 (+ve, ArCH), 164.10 (absent, ArC), 170.00 (absent, CO), 182.98 (absent, CO); Found C 63.64; H 4.71; N 6.37 %.  $C_{23}H_{16}N_2O_3Ni \cdot 0.5H_2O$  requires C 63.30, H 4.36; N 6.42%.

## 2. Photophysical studies – Parameters and Conditions

UV-Vis spectroscopy experiments were carried out on a Shimadzu UV-1601 PC UV-Vis Spectrophotometer by using slit widths of 1.0 nm and matched quartz cells. All metal ion stimulated colour changes have been studied in MeOH-H<sub>2</sub>O (4:1) under buffered conditions. 10 mM HEPES Buffer, at pH  $7.0 \pm 0.1$  was used for these experiments.. However, for the pH dependent studies on receptor – metal complexes, due to poor solubility of the complexes at pH > 9, all respective evaluations were carried out in DMSO – H<sub>2</sub>O (1:1). All absorption scans were saved as ACS II files and further processed in Excel™ to produce all graphs shown. Solutions of **2** were typically 50  $\mu$ M.

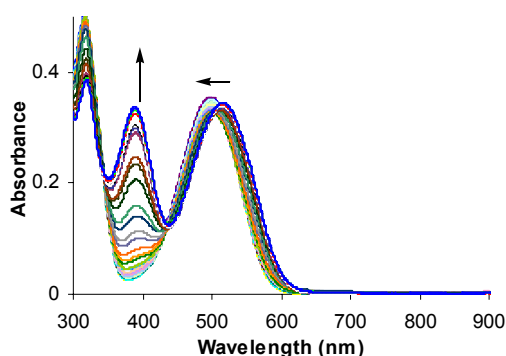

Figure S1: pH titration of **2** in DMSO : H<sub>2</sub>O 1:1

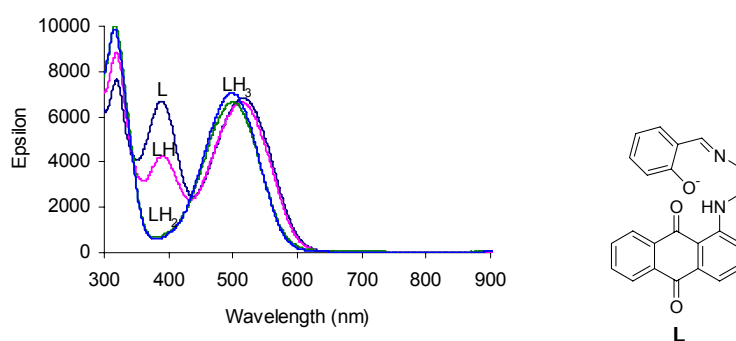

Figure S2. Absorption curves of **2** upon pH titration with acid and base

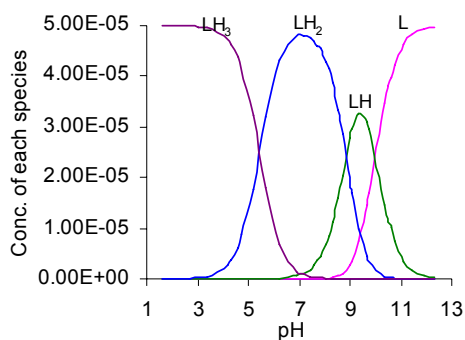

**Figure S3: Species distribution diagram for a system containing solution of 2 upon pH titration with acid and base**

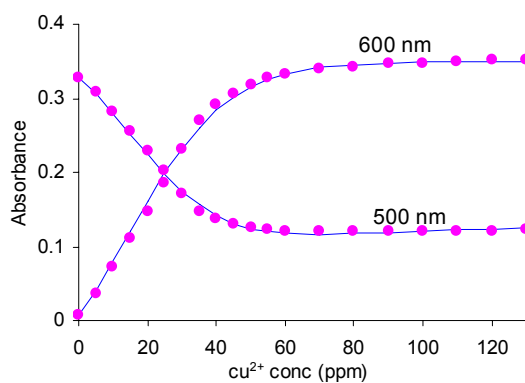

**Figure S4: Cu(II) nitrate Titration of 2 (50  $\mu$ M), CH<sub>3</sub>OH :H<sub>2</sub>O 4:1, pH 7.0  $\pm$  0.1, [10mM HEPES] points refer to experimental values and line to curve fit**

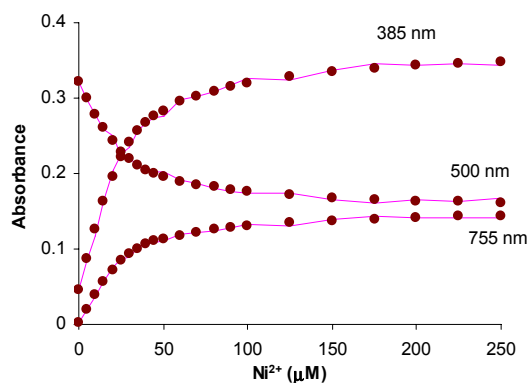

**Figure S5: Ni(II) nitrate Titration of 2 (50  $\mu$ M), CH<sub>3</sub>OH :H<sub>2</sub>O 4:1, pH 7.0  $\pm$  0.1, [10mM HEPES] points refer to experimental values and line to curve fit**

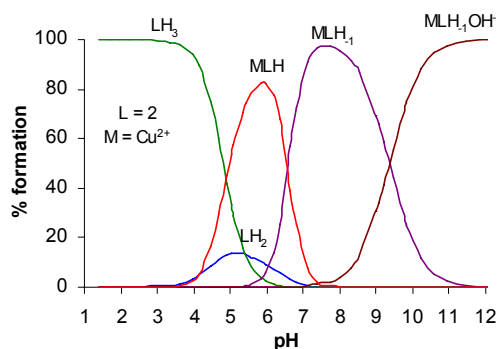

**Figure S6: Species distribution diagram for a system containing 2 and Cu<sup>2+</sup> (1 : 1) at variable pH.**

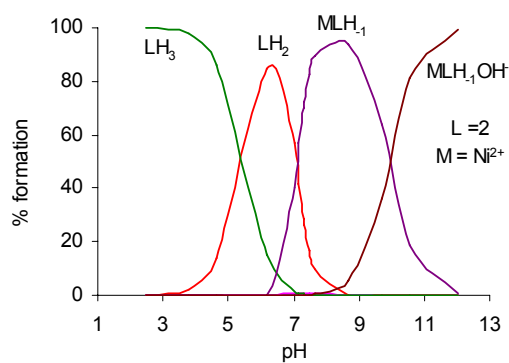

**Figure S7: Species distribution diagram for a system containing 2 and Ni<sup>2+</sup> (1 : 1) at variable pH.**

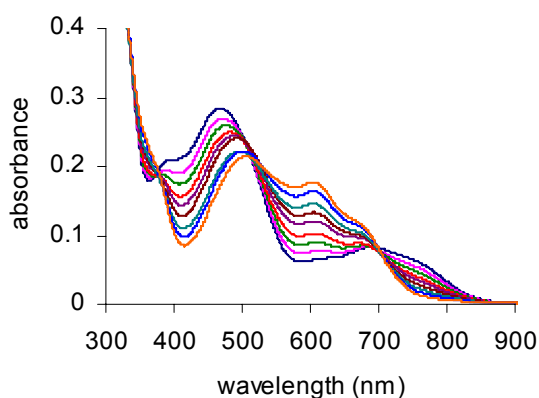

**Figure S8: UV-Vis spectra of 50 μM of receptor 2 in the presence of 25 μM of Cu<sup>2+</sup> and 25 μM of Ni<sup>2+</sup>.**

Table 1: Optical properties and binding characteristics of Schiff base **2** with Ni<sup>2+</sup> and Cu<sup>2+</sup> and effect of pH on log $\beta$  values

|                                                                  | Receptor <b>2</b> | <b>2</b> -Cu <sup>2+</sup> complex | <b>2</b> -Ni <sup>2+</sup> complex |      |
|------------------------------------------------------------------|-------------------|------------------------------------|------------------------------------|------|
| $\lambda_{\text{max}}$ (nm)                                      | 500               | 600                                | 385                                | 750  |
| $\epsilon$ value                                                 | 6500              | 6900                               | 6300                               | 2300 |
| log $\beta$ values at constant pH 7.0                            |                   |                                    |                                    |      |
| log $\beta_{\text{ML}}$                                          | ---               | 5.22                               | 5.33                               |      |
| log $\beta_{\text{ML}2}$                                         | ---               | --                                 | 10.47                              |      |
| log $\beta_{\text{M}2\text{L}3}$                                 | ---               | 18.47                              |                                    |      |
| Log $\beta$ values from <b>2</b> – metal complex Vs.pH titration |                   |                                    |                                    |      |
| log $\beta_{\text{MLH-1}}$                                       | ---               | 5.86                               | 2.14                               |      |
| log $\beta_{\text{MLH-1(OH-1)}}$                                 | ---               | -3.49                              | -7.79                              |      |
| log $\beta_{\text{MLH}}$                                         | ---               | 18.98                              |                                    |      |
